# Supplementary material for: Novel synthesis and catalytic performance of hierarchical MOR
Source: Royal Society of Chemistry journal article supplement (doi:10.1039/d1nj00133g), 2021-01-01
Supplement: d1nj00133g1.pdf [file d1nj00133g1.pdf]

Electronic supplementary information (ESI)

**Novel synthesis and catalytic performance of hierarchical MOR**

Jiaxin Lu, Yaquan Wang\*, Chao Sun, Taotao Zhao, Jingjing Zhao, Ziyang Wang,

Wenrong Liu, Shuhui Wu, Mingxue Shi, Lingzhen Bu

Key Laboratory for Green Chemical Technology of Ministry of Education, School of  
Chemical Engineering & Technology, Tianjin University, Tianjin, 300072, PR China.

\* Corresponding author.

Email address: yqwang@tju.edu.cn

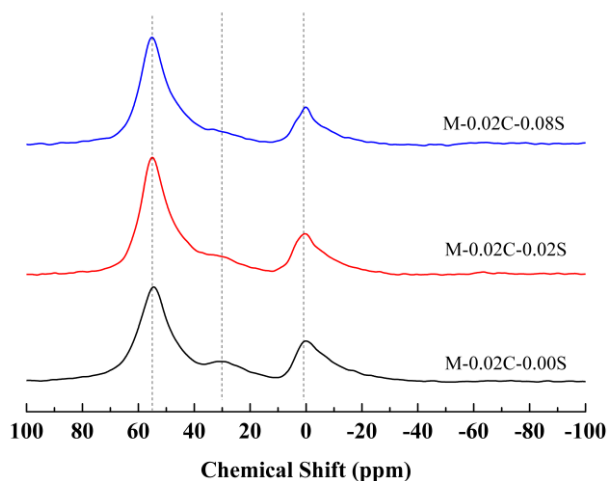

Fig. S1  $^{27}\text{Al}$  MAS NMR spectra of samples.

Table S1 The content of framework and extra-framework Al.

| Catalysts     | $\text{Al}_{\text{ef}}$ (%) | $\text{Al}_{\text{f}}$ (%) |
|---------------|-----------------------------|----------------------------|
| M-0.02C-0.00S | 38.1                        | 61.9                       |
| M-0.02C-0.02S | 30.6                        | 69.4                       |
| M-0.02C-0.08S | 22.9                        | 77.1                       |

### Preparation of M-0.00C-0.00S, M-0.02C-0.00S and M-0.02C-0.08S samples crystallized for different time

In order to study the formation mechanism of hierarchical MOR, a series of samples were prepared under the same synthesis process of the M-0.02C-0.00S and M-0.02C-0.08S samples except for the crystallization time. After the crystallization, the products were recovered by centrifugation and washed with deionized water until the pH reached about 7. Then the samples were dried overnight at 120 °C and calcined at 550 °C in air for 6 h. The synthesized samples are denoted as M-0.02C-0.00S-zh and M-0.02C-0.08S-zh respectively, z represents the crystallization time (z=8, 16, 24, 32,40 and 48).

For comparison, a series of M-0.00C-0.00S-zh samples were prepared with the gel compositions of  $\text{SiO}_2: 0.0333\text{Al}_2\text{O}_3: 0.3167\text{Na}_2\text{O}: 27.5\text{H}_2\text{O}$  and the synthesis

process was the same as M-0.02C-0.08S-zh.

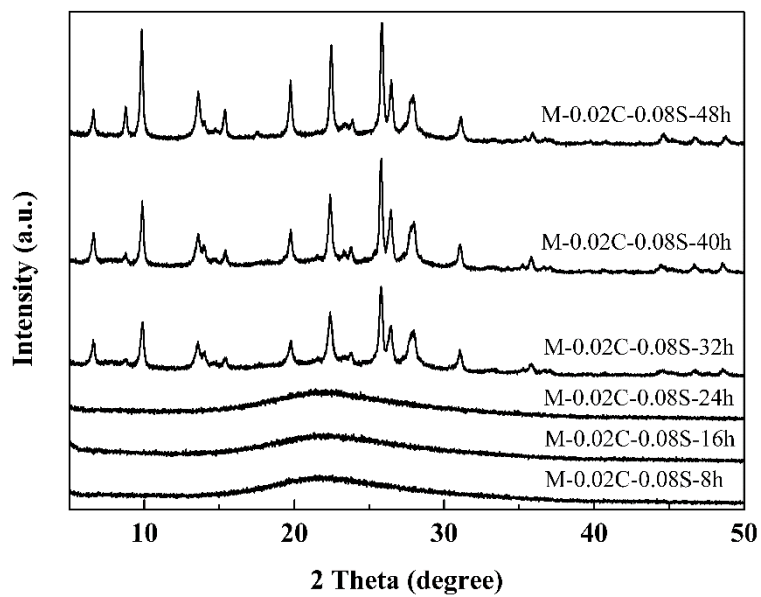

Fig. S2 XRD patterns of M-0.02C-0.08S-zh samples.

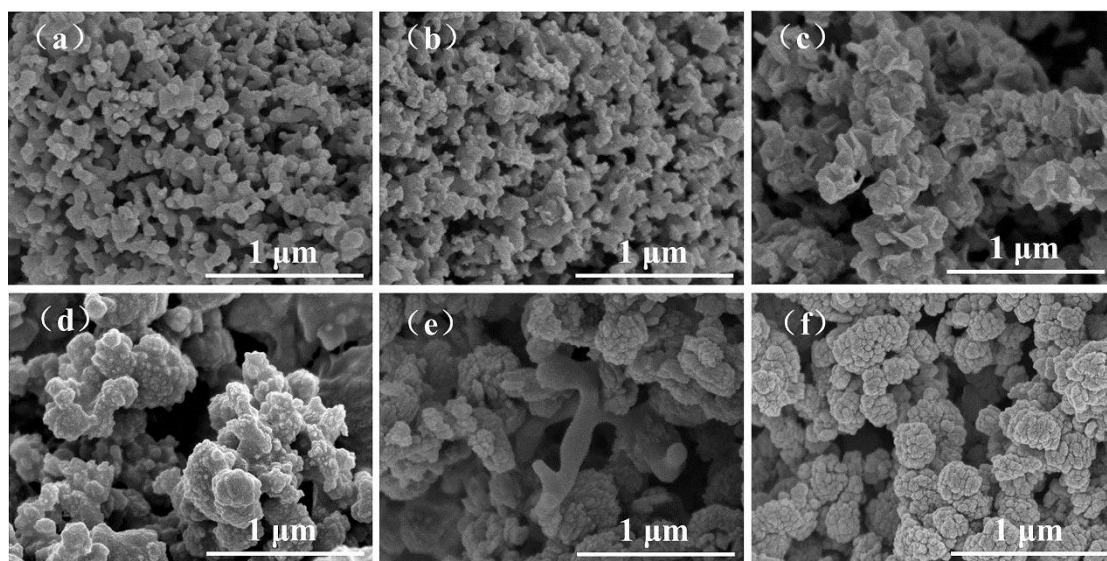

Fig. S3 SEM images of (a) M-0.02C-0.08S-8h; (b) M-0.02C-0.08S-16h; (c) M-0.02C-0.08S-24h;

(d) M-0.02C-0.08S-32h; (e) M-0.02C-0.08S-40h and (f) M-0.02C-0.08S-48h.

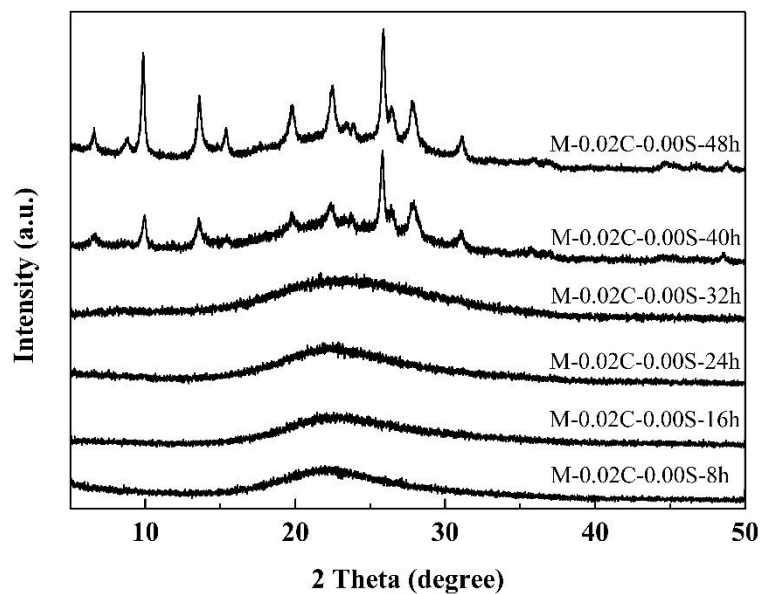

Fig. S4 XRD patterns of M-0.02C-0.00S-zh samples.

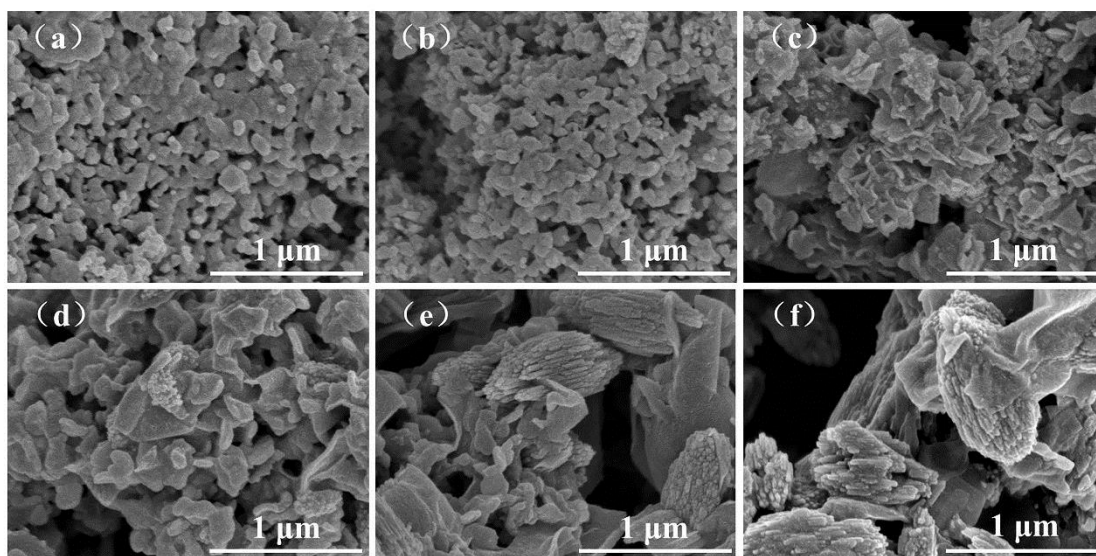

Fig. S5 SEM images of (a) M-0.02C-0.00S-8h; (b) M-0.02C-0.00S-16h; (c) M-0.02C-0.00S-24h; (d) M-0.02C-0.00S-32h; (e) M-0.02C-0.00S-40h and (f) M-0.02C-0.00S-48h.

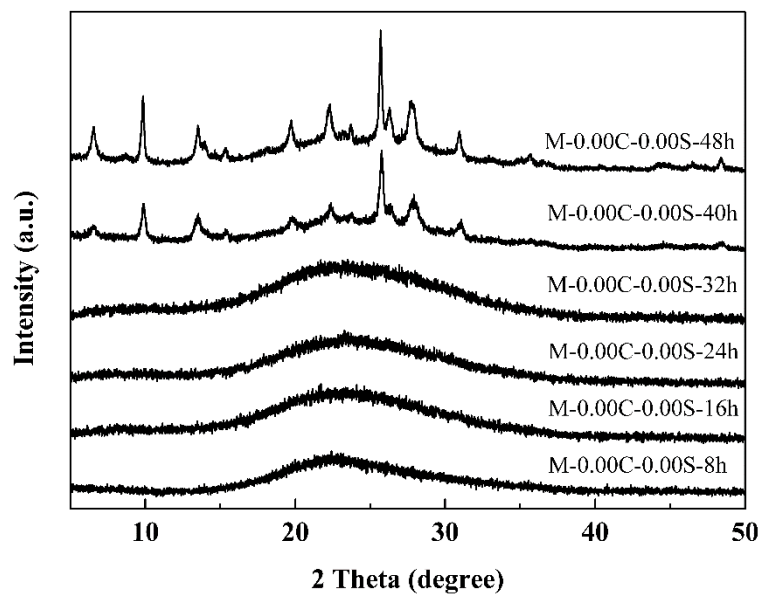

Fig. S6 XRD patterns of M-0.00C-0.00S-zh samples.

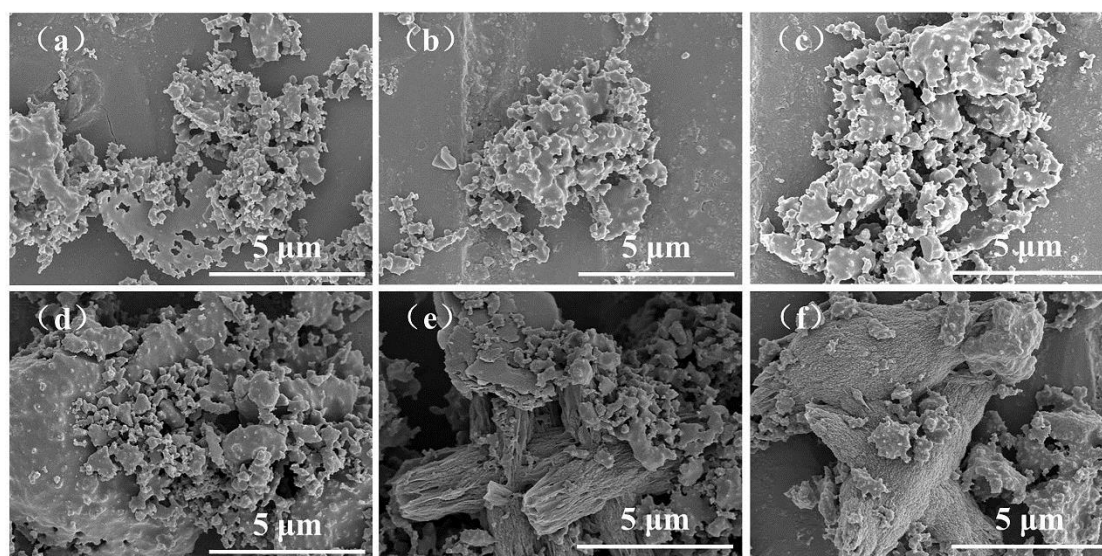

Fig. S7 SEM images of (a) M-0.00C-0.00S-8h; (b) M-0.00C-0.00S-16h; (c) M-0.00C-0.00S-24h; (d) M-0.00C-0.00S-32h; (e) M-0.00C-0.00S-40h and (f) M-0.00C-0.00S-48h.

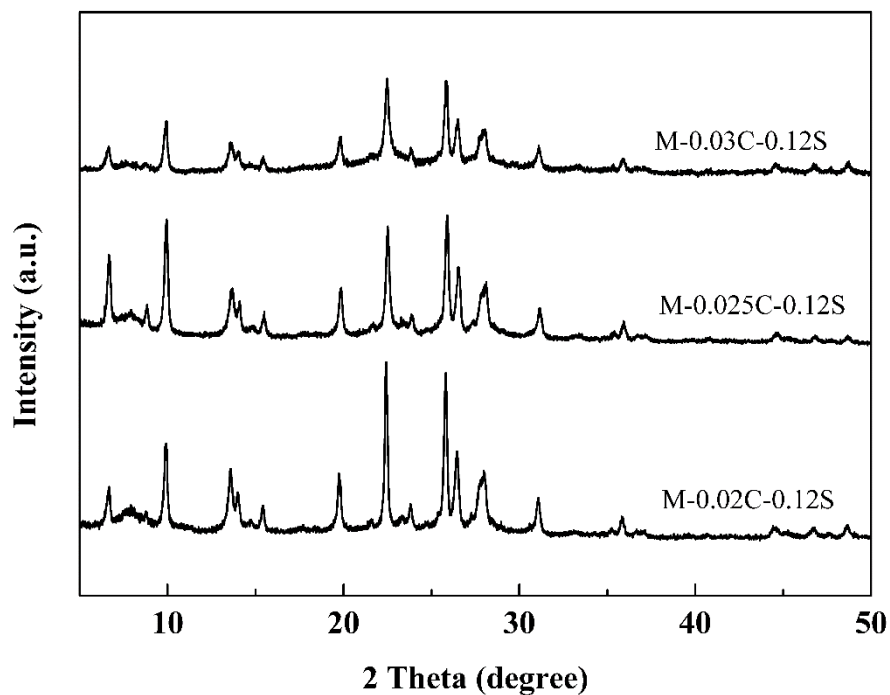

Fig. S8 XRD patterns of M-0.02C-0.12S, M-0.025C-0.12S and M-0.03C-0.12S samples

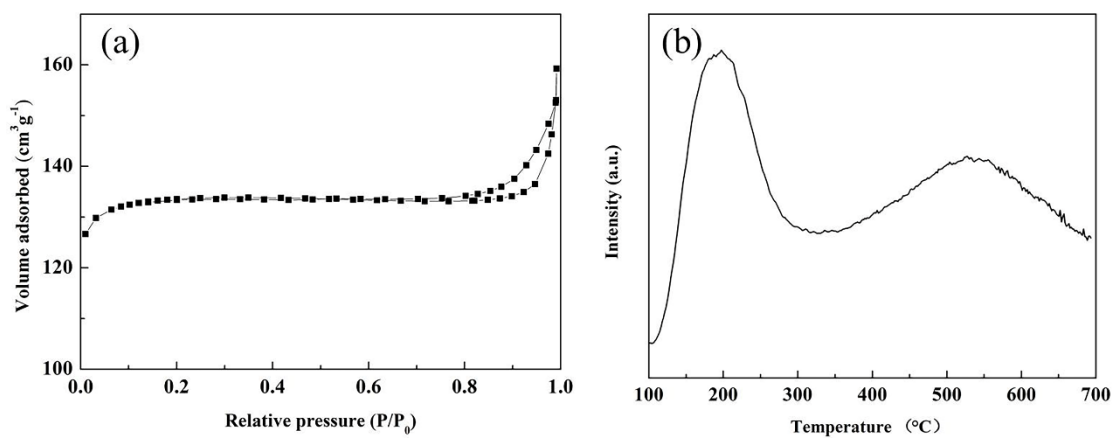

Fig. S9 (a) N<sub>2</sub> adsorption-desorption isotherms of C-MOR and (b) NH<sub>3</sub>-TPD profiles of C-MOR

Table S2 Textural properties of C-MOR.

| Catalysts | SiO <sub>2</sub> /Al <sub>2</sub> O <sub>3</sub> | Surface area (m <sup>2</sup> g <sup>-1</sup> ) |                  |                   | Pore volume (cm <sup>3</sup> g <sup>-1</sup> ) |                    |                   |
|-----------|--------------------------------------------------|------------------------------------------------|------------------|-------------------|------------------------------------------------|--------------------|-------------------|
|           |                                                  | S <sub>BET</sub>                               | S <sub>ext</sub> | S <sub>mico</sub> | V <sub>total</sub>                             | V <sub>micro</sub> | V <sub>meso</sub> |
| C-MOR     | 15                                               | 521                                            | 99               | 422               | 0.220                                          | 0.196              | 0.024             |

Table S3 Acid amounts determined by NH<sub>3</sub>-TPD of C-MOR.

| Catalysts | Total acidity (mmol g <sup>-1</sup> ) | Weak acidity (mmol g <sup>-1</sup> ) | Strong acidity (mmol g <sup>-1</sup> ) |
|-----------|---------------------------------------|--------------------------------------|----------------------------------------|
| C-MOR     | 1.093                                 | 0.912                                | 0.181                                  |
